# Supplementary material for: RETRACTED: Assessment of 2-Pentadecyl-2-oxazoline Role on Lipopolysaccharide-Induced Inflammation on Early Stage Development of Zebrafish (Danio rerio)
Source: MDPI journal article supplement (doi:10.3390/life12010128), 2022-01-17
Supplement: s1 [file s1]

# Supplementary material of Assessment of 2-Pentadecyl-2-Oxazoline Role on Lipopolysaccharide-Induced Inflammation on Early Stage Development of Zebrafish (*Danio rerio*)

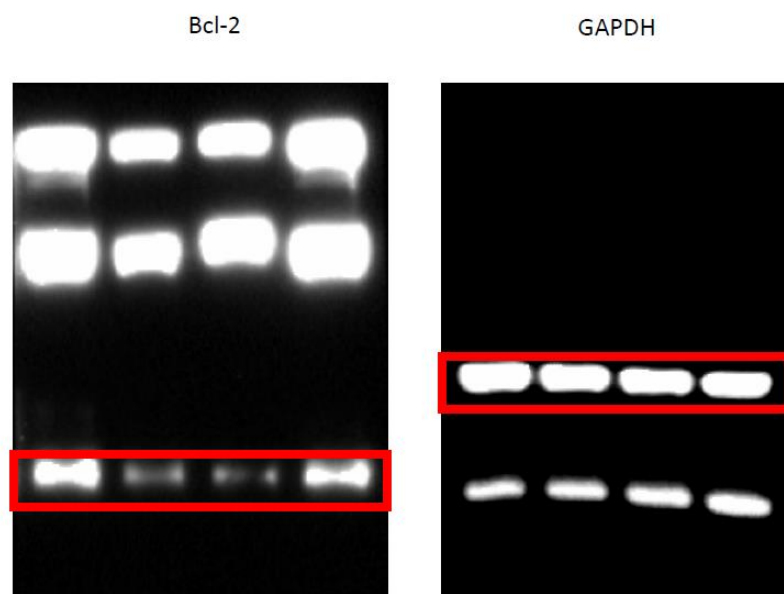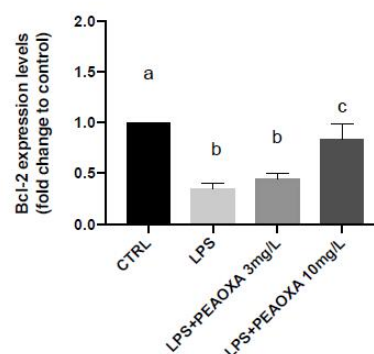

Bars of group labelled with different letters (a , b, c) denote significant differences ( $p < 0.05$ ).

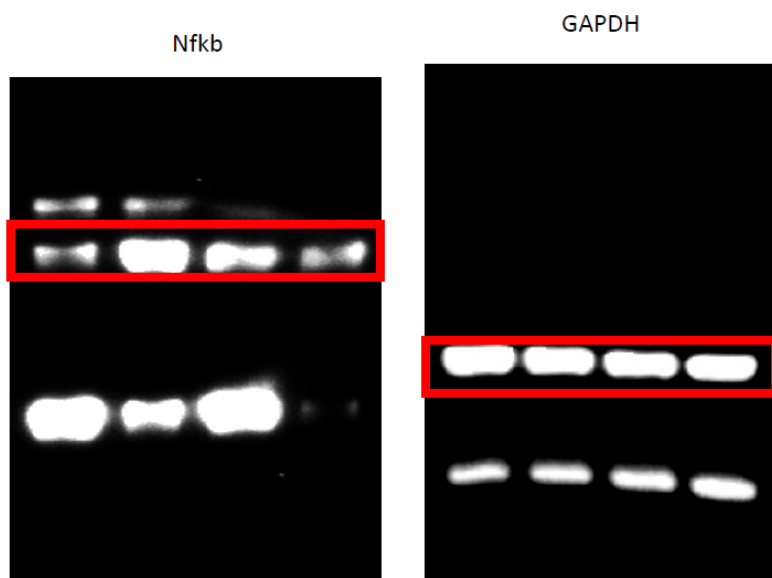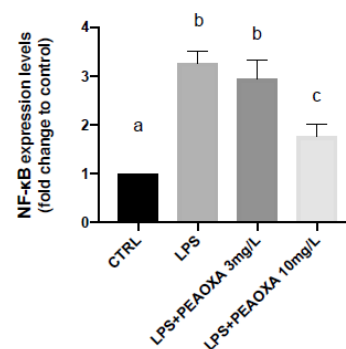

Bars of group labelled with different letters (a , b, c) denote significant differences ( $p < 0.05$ ).

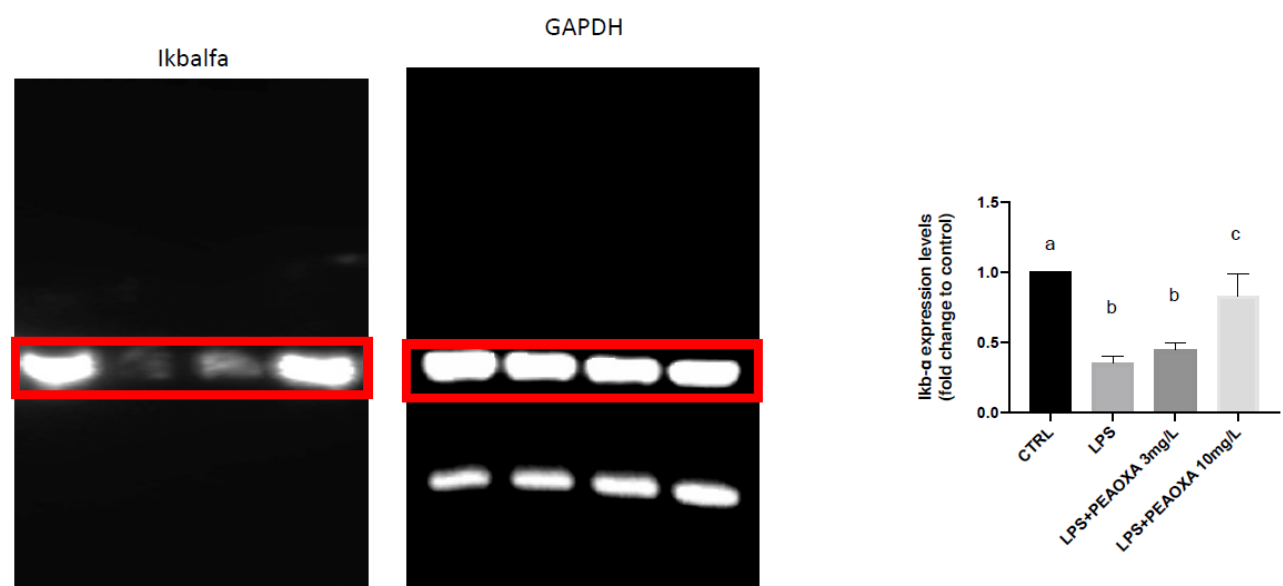

Bars of group labelled with different letters (a , b, c) denote significant differences ( $p < 0.05$ ).

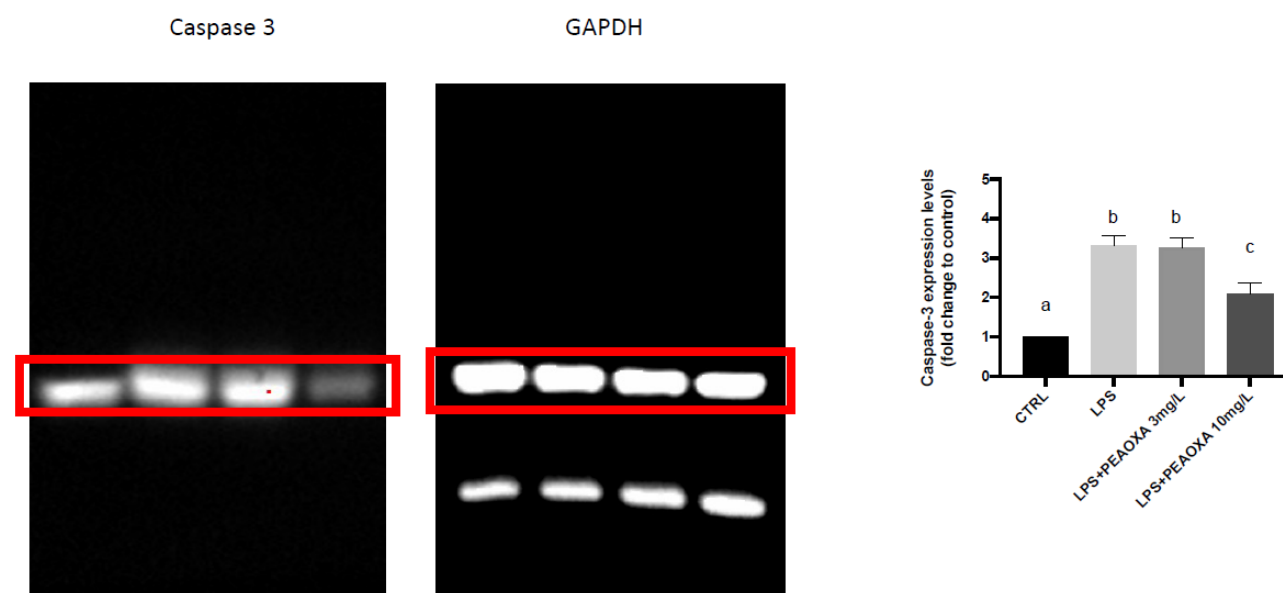

Bars of group labelled with different letters (a , b, c) denote significant differences ( $p < 0.05$ ).

Figure S1. uncropped western blot.
